# Supplementary material for: Regulation of protein–protein binding by coupling between phosphorylation and intrinsic disorder: analysis of human protein complexes
Source: Royal Society of Chemistry journal article supplement (doi:10.1039/c3mb25514j), 2013-01-11
Supplement: c3mb25514j.pdf [file c3mb25514j.pdf]

## Supplementary Material

**Table S1. P-values for Spearman correlation between phosphorylation, disorder, interface, and homo/heterooligomeric sites.** Red cells mark positive significant correlations, blue cells mark negative significant correlations, and yellow cells represent insignificant correlations.

|             | Phospho | Disorder | Interface | Homo/Hetero |
|-------------|---------|----------|-----------|-------------|
| <i>All</i>  |         |          |           |             |
| Phospho     | 0.000   | 0.000    | 0.000     | 0.000       |
| Disorder    | 0.000   | 0.000    | 0.000     | 0.115       |
| Interface   | 0.000   | 0.000    | 0.000     | 0.000       |
| Homo/Hetero | 0.000   | 0.115    | 0.000     | 0.000       |
| <i>Ser</i>  |         |          |           |             |
| Phospho     | 0.000   | 0.000    | 0.000     | 0.002       |
| Disorder    | 0.000   | 0.000    | 0.000     | 0.889       |
| Interface   | 0.000   | 0.000    | 0.000     | 0.000       |
| Homo/Hetero | 0.002   | 0.889    | 0.000     | 0.000       |
| <i>Thr</i>  |         |          |           |             |
| Phospho     | 0.000   | 0.000    | 0.000     | 0.002       |
| Disorder    | 0.000   | 0.000    | 0.000     | 0.000       |
| Interface   | 0.000   | 0.000    | 0.000     | 0.000       |
| Homo/Hetero | 0.002   | 0.000    | 0.000     | 0.000       |
| <i>Tyr</i>  |         |          |           |             |
| Phospho     | 0.000   | 0.000    | 0.000     | 0.096       |
| Disorder    | 0.000   | 0.000    | 0.000     | 0.081       |
| Interface   | 0.000   | 0.000    | 0.000     | 0.000       |
| Homo/Hetero | 0.096   | 0.081    | 0.000     | 0.000       |

**Table S2. Contingency table of disorder, interface, and phosphorylation sites.** The numbers of Ser, Thr, and Tyr in each category are shown in parenthesis. Non-interface residues include all residues with the exception of residues.

|                        | Phosphorylation sites |               | Non-phosphorylation sites |                   |
|------------------------|-----------------------|---------------|---------------------------|-------------------|
|                        | Disorder              | Order         | Disorder                  | Order             |
| <i>Overall</i>         |                       |               |                           |                   |
| Interface              | 100                   | 484           | 300                       | 5920              |
| (Ser/Thr/Tyr)          | (59/26/15)            | (143/110/231) | (154/106/40)              | (2272/2000/1648)  |
| Non-interface          | 148                   | 1250          | 696                       | 24155             |
| (Ser/Thr/Tyr)          | (94/39/15)            | (488/297/465) | (395/238/63)              | (10337/8727/5091) |
| <i>Homooligomers</i>   |                       |               |                           |                   |
| Interface              | 29                    | 153           | 120                       | 2388              |
| Non-interface          | 58                    | 571           | 334                       | 11444             |
| <i>Heterooligomers</i> |                       |               |                           |                   |
| Interface              | 71                    | 331           | 180                       | 3532              |
| Non-interface          | 90                    | 679           | 362                       | 12711             |

A

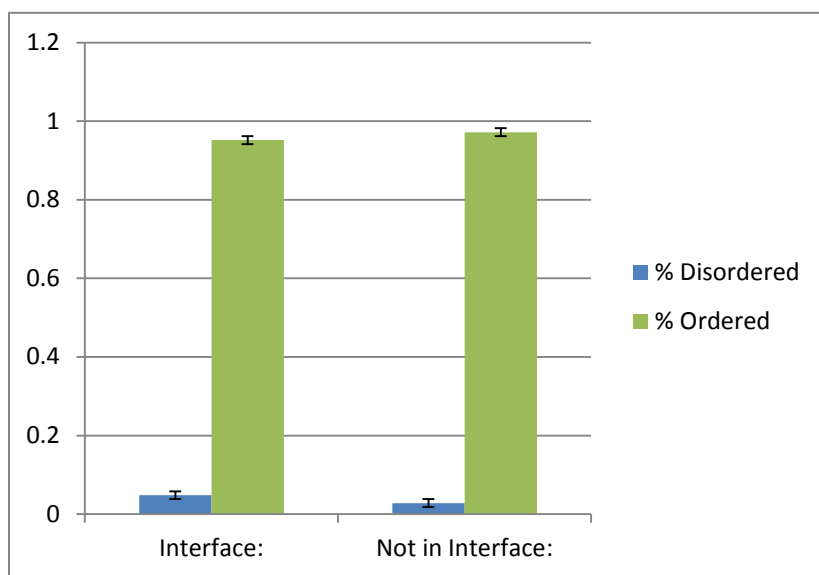

B

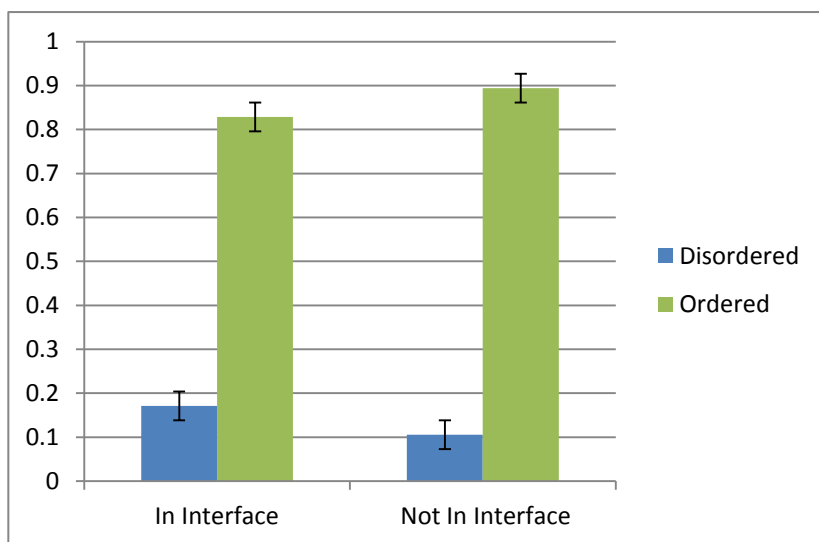

**Figure S1. Percentage of disordered/ordered sites on interface and non-interface for non-phosphorylated sites (A) and phosphorylated sites (B).**

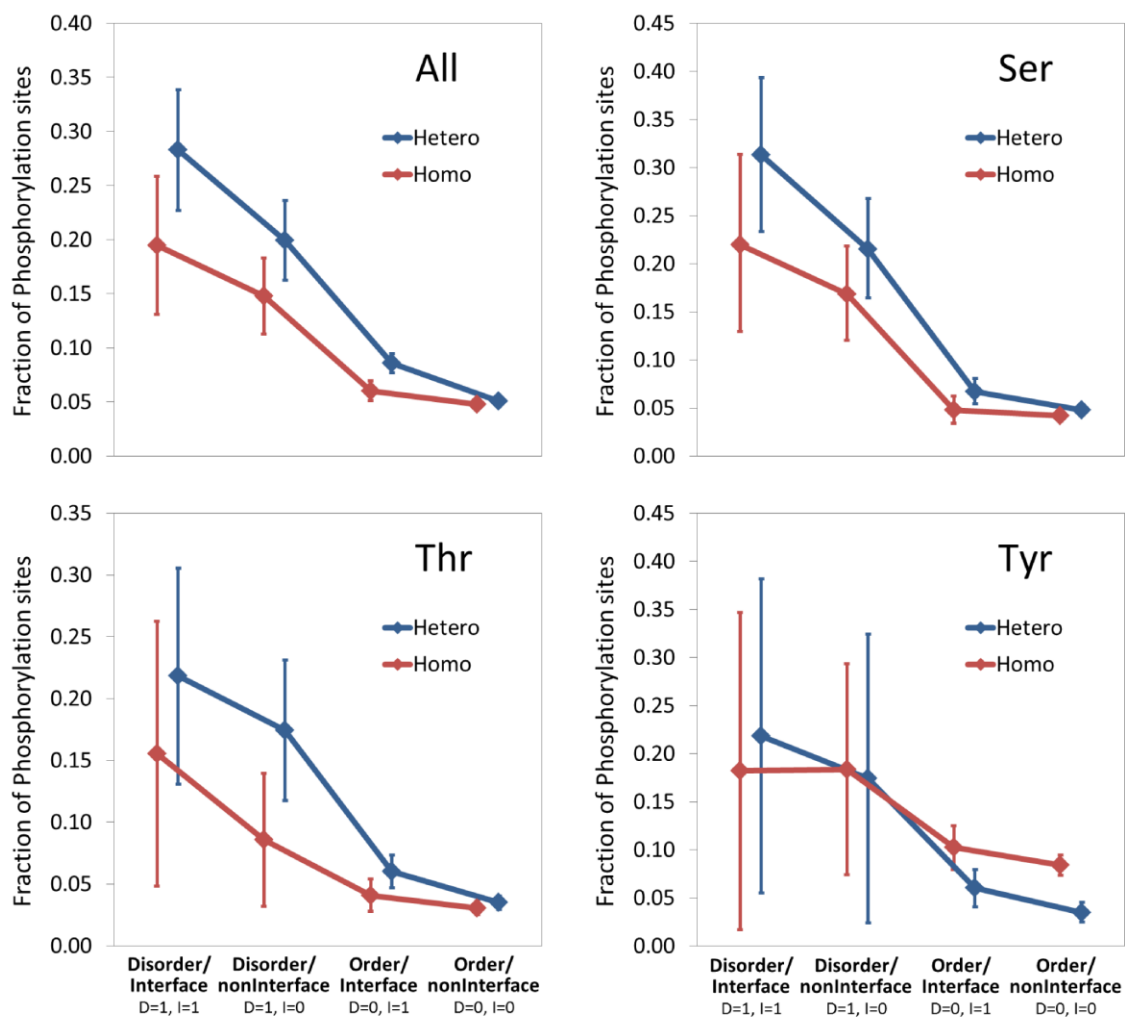

**Figure S2: Fraction of phosphorylation sites plotted versus other variables for homo and heterooligomers for both solvent accessible and buried sites. Homo and heterooligomers are shown in red and blue, respectively.**
